# Supplementary material
Source: Springer Nature journal article supplement (https://www.springermedizin.de/resource/supplementary/12911_2013_768_MOESM5_ESM.pdf/9526284)

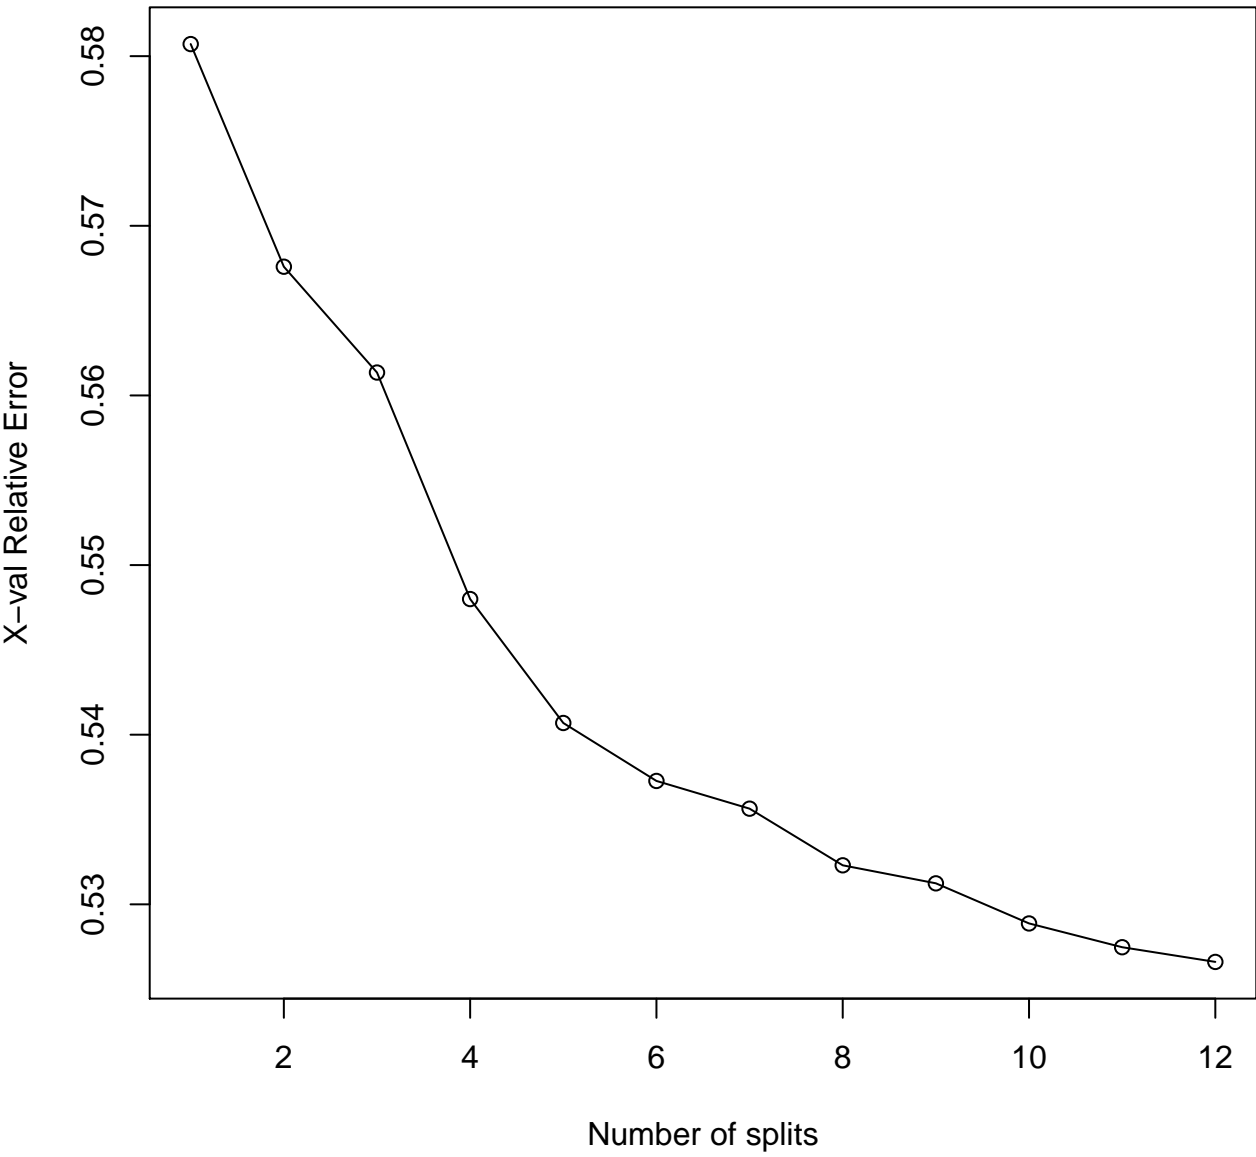

Supplement: MOESM5 [file 9526284]
